# Supplementary material for: Surface Passivation of Perovskite Solar Cells Toward Improved Efficiency and Stability
Source: PubMed Central journal article supplement (PMC7770653; doi:10.1007/s40820-019-0282-0), 2019-06-07
Supplement: 40820_2019_282_MOESM1_ESM.pdf [file 40820_2019_282_MOESM1_ESM.pdf]

Supporting Information for

## Surface Passivation of Perovskite Solar Cells toward Improved Efficiency and Stability

Zhiqi Li<sup>1</sup>, Jiajun Dong<sup>2</sup>, Chunyu Liu<sup>1</sup>, Jiaxin Guo<sup>1</sup>, Liang Shen<sup>1</sup>, Wenbin Guo<sup>1,\*</sup>

<sup>1</sup>State Key Laboratory on Integrated Optoelectronics, College of Electronic Science and Engineering, Jilin University, 2699 Qianjin Street, Changchun 130012, People's Republic of China

<sup>2</sup>State Key Laboratory on Superhard Materials, Jilin University, 2699 Qianjin Street, Changchun 130012, People's Republic of China

Zhiqi Li and Jiajun Dong contributed equally to this work

\*Corresponding author. E-mail: guowb@jlu.edu.cn (W.B. Guo)

### Supplementary Table and Figures

| Time | Structure                                                              | V <sub>oc</sub> | J <sub>sc</sub> | FF    | PCE   | References                            |
|------|------------------------------------------------------------------------|-----------------|-----------------|-------|-------|---------------------------------------|
| 2015 | ITO/TiO <sub>2</sub> /cross-linked MAPbI <sub>3</sub> /Spiro-OMeTAD/Au | 1.00            | 22.05           | 0.75  | 16.55 | Nat. Chem. 7,703 (2015)               |
| 2015 | ITO/PTAA/MAPbI <sub>3</sub> /PCBM/BCP/AL                               | 1.07            | 22.00           | 76.8  | 18.1  | Nat. Commun. 6, 7747 (2015)           |
| 2016 | ITO/PTAA/MAPbI <sub>3</sub> /PS/C <sub>60</sub> /BCP/Ag                | 1.10            | 22.90           | 77.6  | 20.3  | Adv. Mater. 28, 6734 (2016)           |
| 2017 | ITO/TiO <sub>2</sub> /MAPbI <sub>3</sub> /ZrO <sub>2</sub> /C          | 1.054           | 21.45           | 70.3  | 15.95 | Nat. Commun. 8, 15684 (2017)          |
| 2017 | ITO/PEDOT:PSS:GO/MAPbI <sub>3</sub> /PCBM/Ag                           | 0.94            | 21.92           | 74.78 | 15.34 | Nano-Micro Lett. 9, 39 (2017)         |
| 2018 | ITO/TiO <sub>2</sub> -Cl/CsMAFA/Spiro-OMeTAD/Au                        | 1.196           | 22.2            | 76.4  | 20.3  | Science 355, 722(2017).               |
| 2018 | ITO/NiO/MAPbI <sub>3</sub> /TiO <sub>2</sub> /Ag                       | 1.14            | 21.96           | 82.00 | 20.50 | ACS Energy Lett. 3, 2891 (2018)       |
| 2018 | ITO/PTAA/PS/MAPbI <sub>3</sub> /PCBM/Bphen/Ag                          | 1.12            | 23.38           | 77.10 | 20.16 | Small 14, 1704007 (2018)              |
| 2018 | ITO/NiO/MAPbI <sub>3</sub> /PCBM/PPDIN6/Ag                             | 1.08            | 22.68           | 83.40 | 20.43 | Nano Energy 52, 300 (2018)            |
| 2018 | ITO/TiO <sub>2</sub> /MAPbI <sub>3</sub> /PHPT-Py/Rutin-AgNP/Ag        | 1.11            | 25.25           | 74.05 | 20.78 | Adv. Sci. 1800568 (2018)              |
| 2018 | ITO/TiO <sub>2</sub> -Cl/CsMAFA/Spiro-OMeTAD/Au                        | 1.15            | 23.80           | 0.77  | 21.10 | Adv. Funct. Mater. 28, 1706287 (2018) |
| 2019 | ITO/TiO <sub>2</sub> /MAPbI <sub>3</sub> /C                            | 0.97            | 21.47           | 67.04 | 13.98 | J. Power Sources 422, 138 (2019)      |
| 2019 | ITO/TiO <sub>2</sub> -Cl/CsMAFA/Spiro-OMeTAD/Au                        | 1.19            | 23.2            | 78.2  | 20.49 | Adv. Energy Mater. 9, 1802646 (2019)  |
| 2019 | ITO/A14083/MAPbI <sub>3</sub> /PCBM/Bphen/Ag                           | 1.13            | 22.4            | 80.00 | 20.30 | Adv. Mater. 31, 1805554 (2019)        |

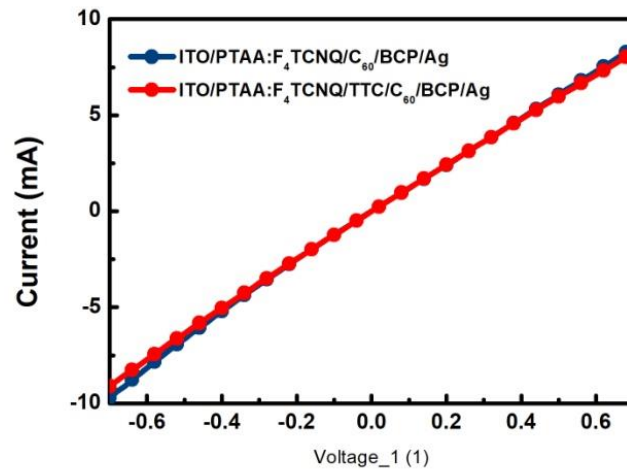

**Fig. S1** Current-voltage ( $I$ - $V$ ) curves of the ITO/PTAA:F<sub>4</sub>TCNQ/TTC/C<sub>60</sub>/BCP/Ag and ITO/PTAA:F<sub>4</sub>TCNQ/C<sub>60</sub>/BCP/Ag films

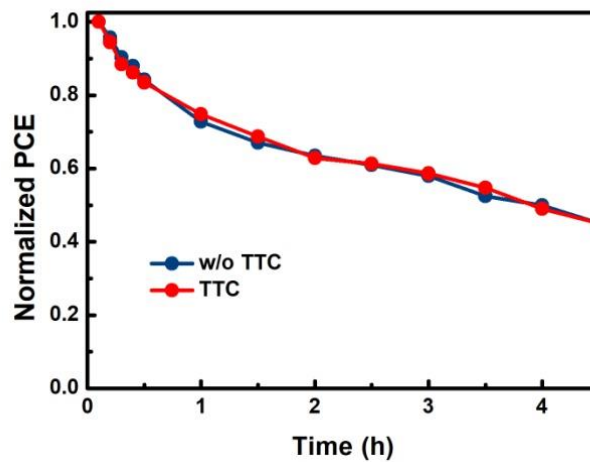

**Fig. S2** Evolution of PCE for normalized solar cell without and with TTC under continuous illumination
